# Supplementary material for: Effect of Hydrogen Plasma Treatment on the Sensitivity of ZnO Based Electrochemical Non-Enzymatic Biosensor
Source: MDPI journal article supplement (doi:10.3390/bios13080793), 2023-08-07
Supplement: s1 [file s1]

# Effect of Hydrogen Plasma Treatment on the Sensitivity of ZnO based Electrochemical Non-Enzymatic Biosensor

Diana B. Tolubayeva <sup>1</sup>, Lesya V. Gritsenko <sup>2,3,\*</sup>, Yevgeniya Y. Kedruk <sup>2,3</sup>, Madi B. Aitzhanov <sup>3</sup>, Renata R. Nemkayeva <sup>3</sup>, and Khabibulla A. Abdullin <sup>3,\*</sup>

<sup>1</sup> Karaganda Industrial University, Republic Ave. 30, Temirtau 101400, Kazakhstan; dianajianna@gmail.com

<sup>2</sup> Satbayev University, Satpayev str., 22, Almaty 050013, Kazakhstan; y.kedruk@satbayev.university (Y.Y.K.)

<sup>3</sup> National Nanotechnology Laboratory of Open Type (NNLOT), al-Farabi Kazakh National University, al-Farabi ave., 71, Almaty 050040, Kazakhstan; madi.aitzhanov@mail.ru (M.B.A.); nemkayeva.renata@gmail.com (R.R.N.)

\* Correspondence: l.gritsenko@satbayev.university (L.V.G.); kh.abdullin@physics.kz (K.A.A.)

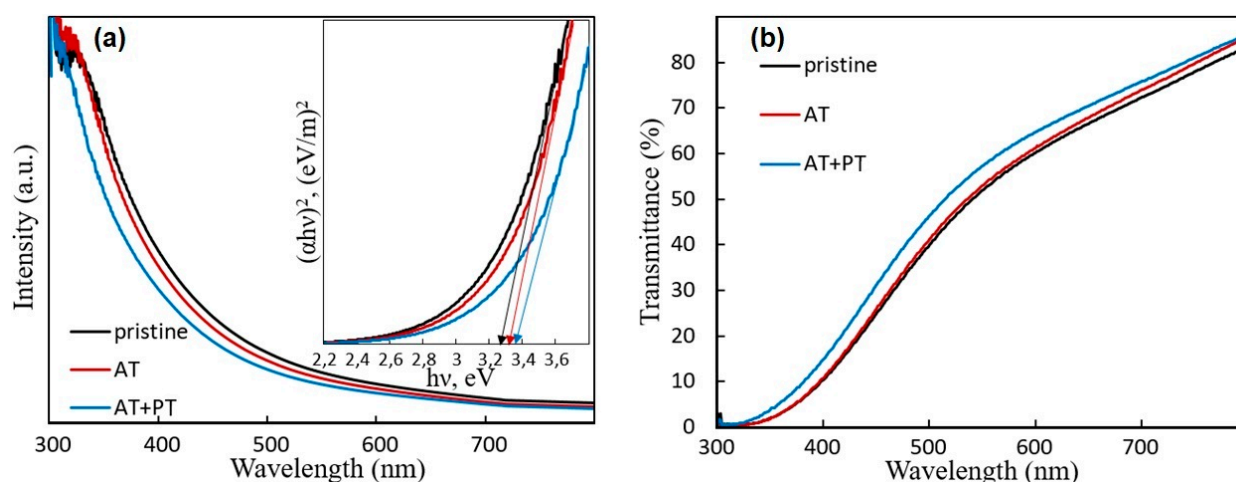

**Figure S1.** UV-Visible absorption (a) and transmittance (b) studies of ZnO nanowires.

**Citation:** To be added by editorial staff during production.

Academic Editor: Firstname Last-name

Received: date

Revised: date

Accepted: date

Published: date

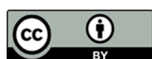

**Copyright:** © 2023 by the authors.

Submitted for possible open access publication under the terms and conditions of the Creative Commons Attribution (CC BY) license (<https://creativecommons.org/licenses/by/4.0/>).

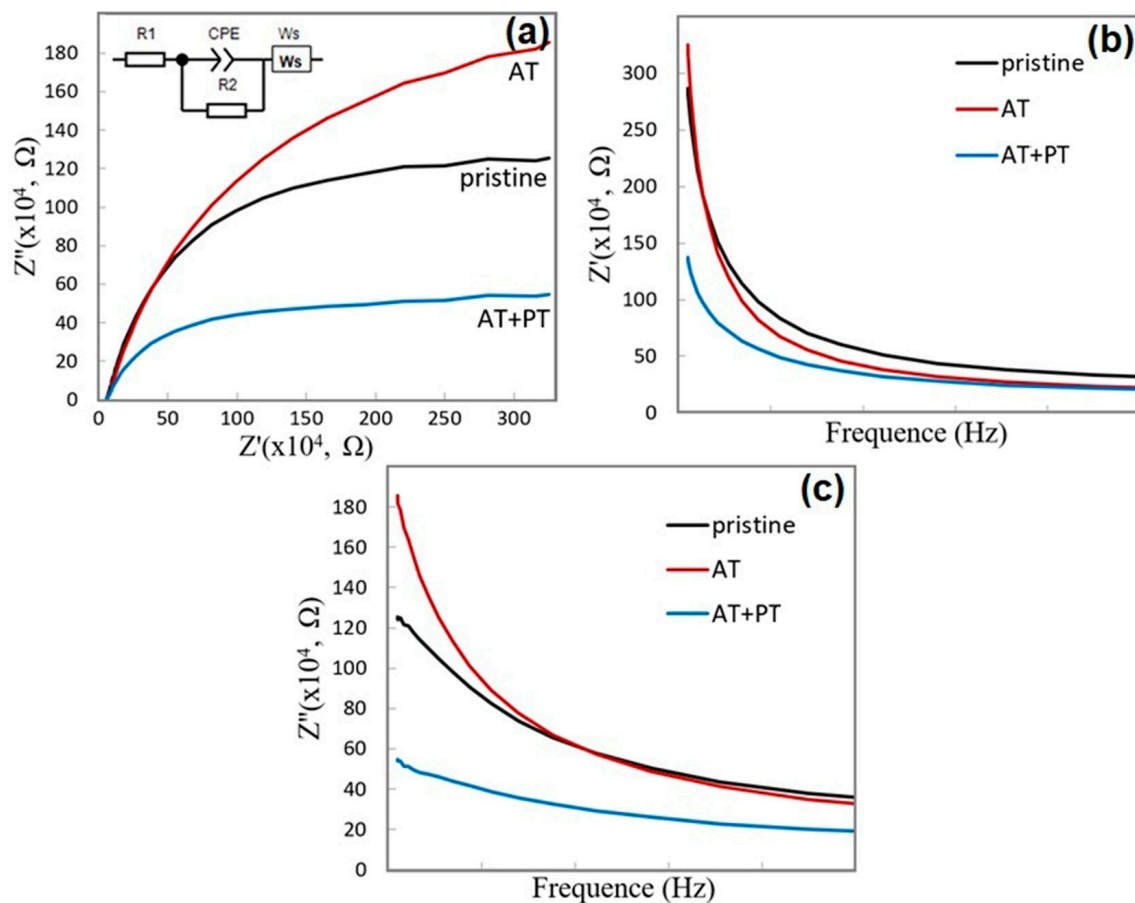

**Figure S2.** (a) Nyquist semicircle graph for fabricated ZnO NW/ITO electrodes; (b) dependences of the active impedance components on the frequency; (c) dependences of the reactive impedance components on the frequency.

17  
18  
19
